# Supplementary material for: Cysticercosis in Shandong Province, Eastern China
Source: PubMed Central journal article supplement (PMC5782879; doi:10.3201/eid2402.151253), 2018-02
Supplement: 15-1253-Techapp-s1.pdf [file 15-1253-Techapp-s1.pdf]

# Cysticercosis in Shandong Province, Eastern China

## Technical Appendix

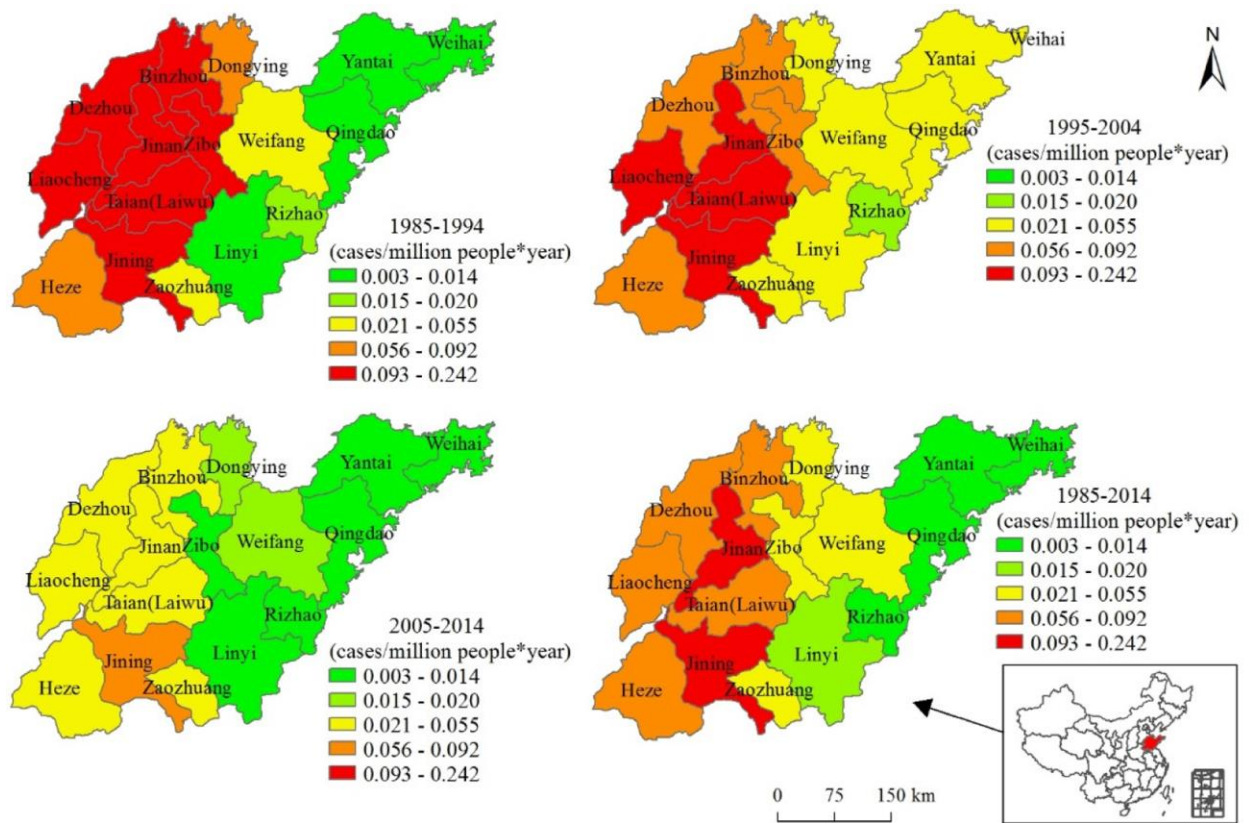

**Technical Appendix Figure.** Dynamic geographic distribution of cysticercosis incidence risk in Shandong Province, China. A) 1985–1994; B) 1995–2004; C) 2005–2014; D) 1985–2014.
